# Supplementary material for: An Open Label, Adaptive, Phase 1 Trial of High‐Dose Oral Nitazoxanide in Healthy Volunteers: An Antiviral Candidate for SARS‐CoV‐2
Source: PubMed Central journal article supplement (PMC8653087; doi:10.1002/cpt.2463), 2021-11-13

Figure S2. 12-lead electrocardiogram taken 12-hours following second dose of 1500mg nitafoxanide in participant 6 displaying artefactual prolonged QTcB with U on T phenomemom.

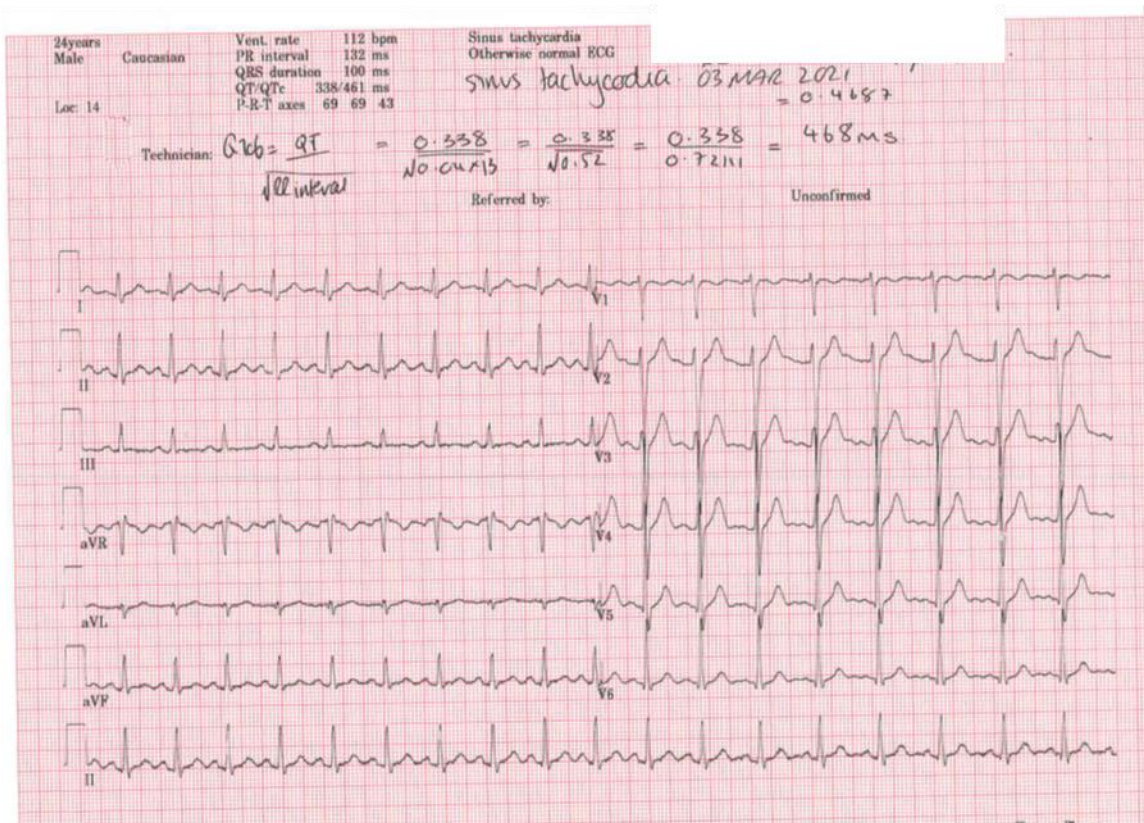

Supplement: CPT-111-585-s005.pdf [file CPT-111-585-s005.pdf]
