# Supplementary material for: An Open Label, Adaptive, Phase 1 Trial of High‐Dose Oral Nitazoxanide in Healthy Volunteers: An Antiviral Candidate for SARS‐CoV‐2
Source: PubMed Central journal article supplement (PMC8653087; doi:10.1002/cpt.2463), 2021-11-13

Figure S1: Schematic and equations of PK model for Tizoxanide and Tizoxanide-Glucuronide plasma concentrations, fitted to observed exposure data.

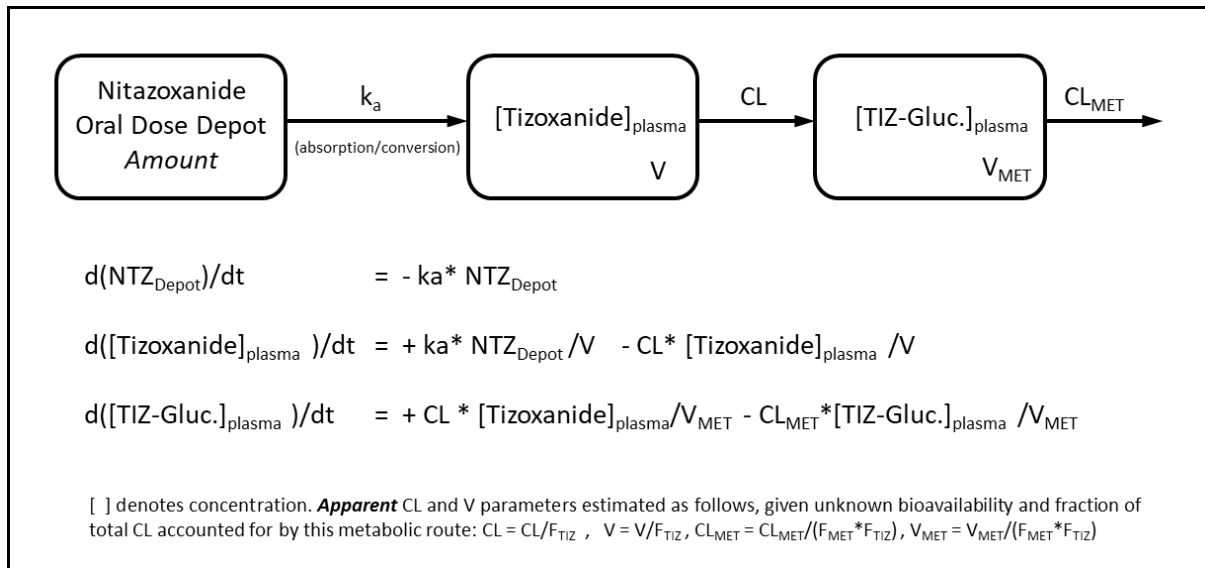

Supplement: CPT-111-585-s006.pdf [file CPT-111-585-s006.pdf]
